# Supplementary material
Source: PubMed Central journal article supplement (PMC3646420)

Supplemental Figure 1

Ad Lib + Saline

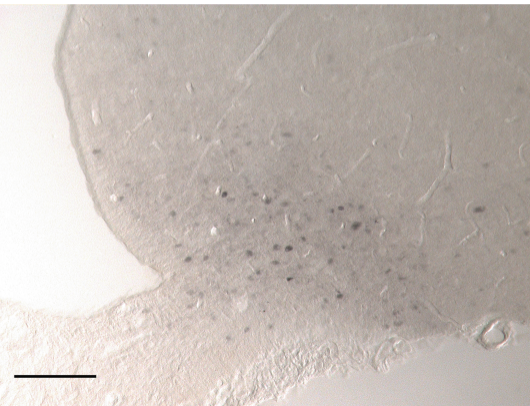

Fast + Saline

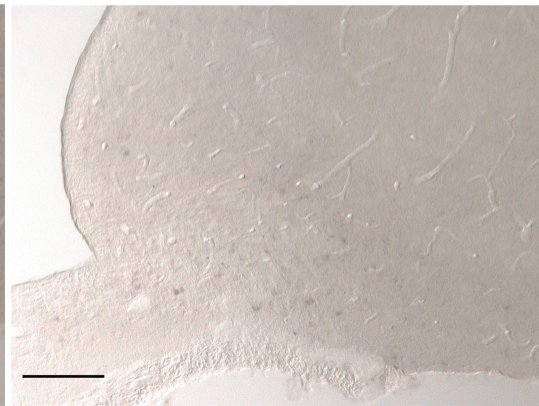

Fast + Leptin (500ng/hr)

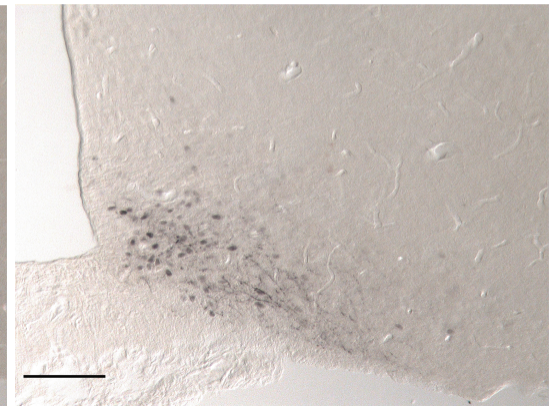

Supplement: NIHMS449542-supplement-Supplementary_Figure_1.pdf [file NIHMS449542-supplement-Supplementary_Figure_1.pdf]

Supplemental Figure 2

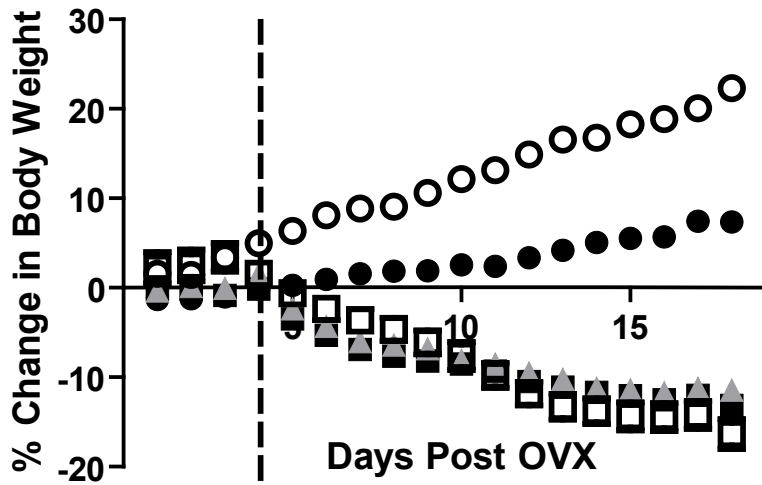

- OVX+E
- OVX+E CR
- ▲ OVX+E CR+L
- OVX
- OVX CR\*

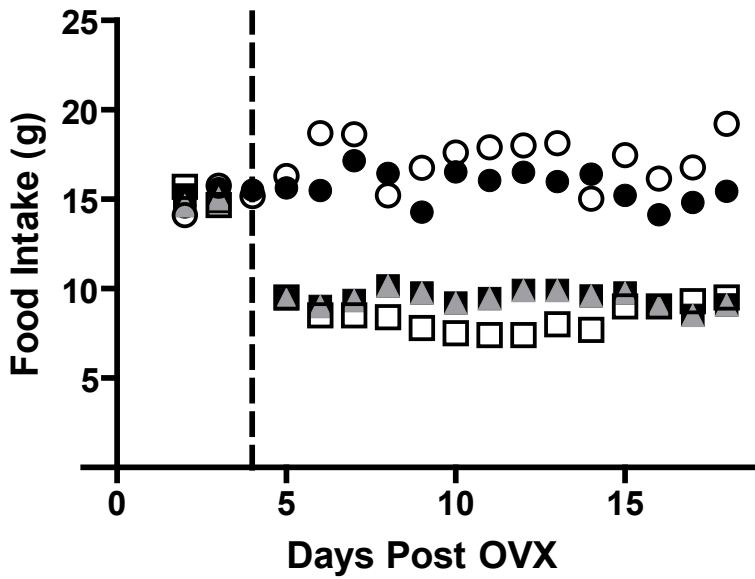

Supplement: NIHMS449542-supplement-Supplementary_Figure_2.pdf [file NIHMS449542-supplement-Supplementary_Figure_2.pdf]

# Supplemental Figure 3

A.

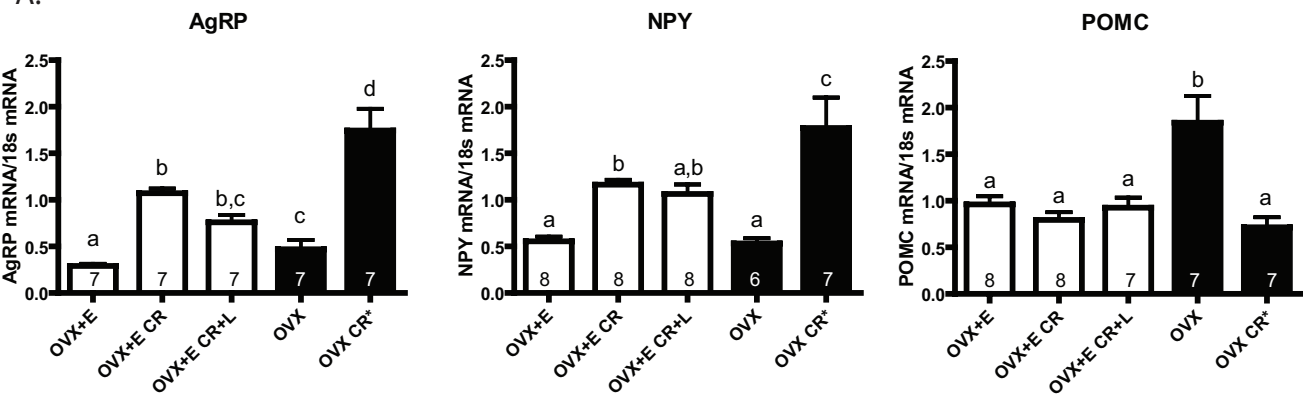

B.

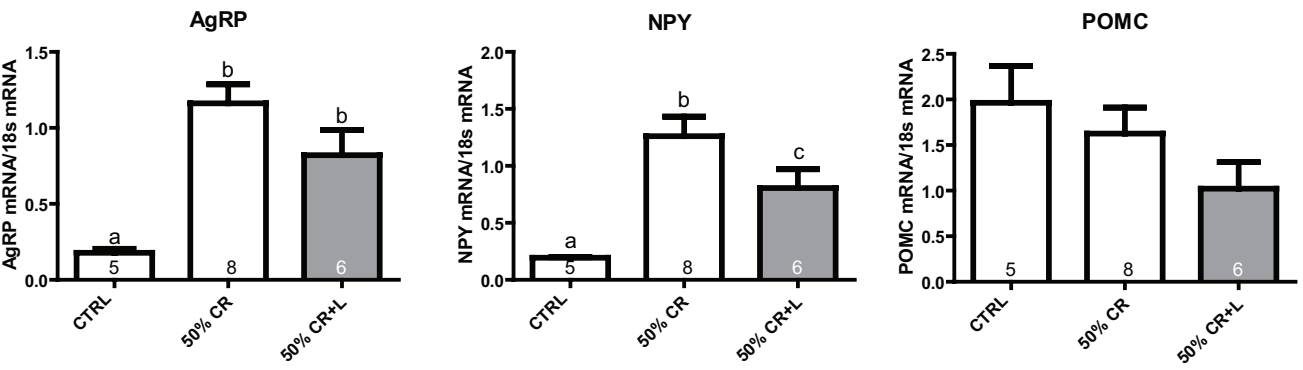

Supplement: NIHMS449542-supplement-Supplementary_Figure_3.pdf [file NIHMS449542-supplement-Supplementary_Figure_3.pdf]
